# Supplementary material for: Resistant Starch Type 2 from Wheat Reduces Postprandial Glycemic Response with Concurrent Alterations in Gut Microbiota Composition
Source: PubMed Central journal article supplement (PMC7922998; doi:10.3390/nu13020645), 2021-02-17
Supplement: nutrients-13-00645-s001.pdf [file nutrients-13-00645-s001.pdf]

Supplementary Material

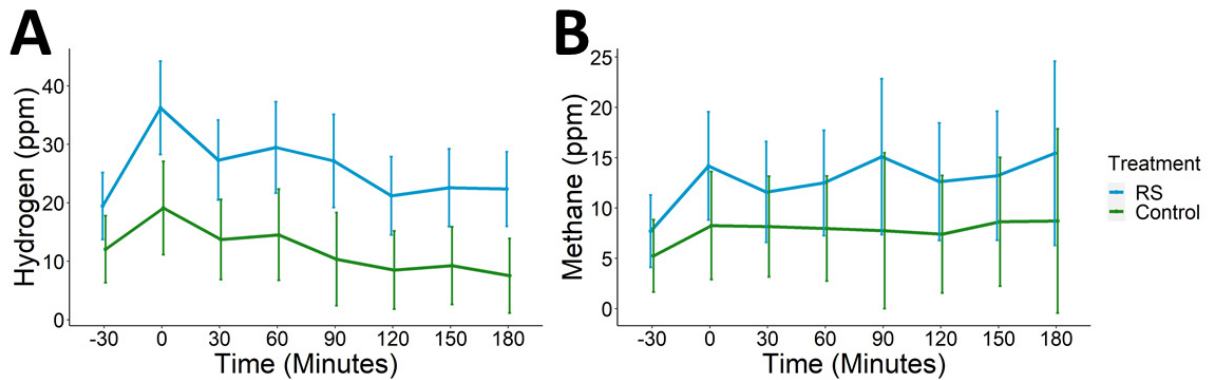

**Figure S1. Postprandial curves.** Postprandial curves shown for A) hydrogen and B) methane. Values shown are mean and 95% confidence interval.

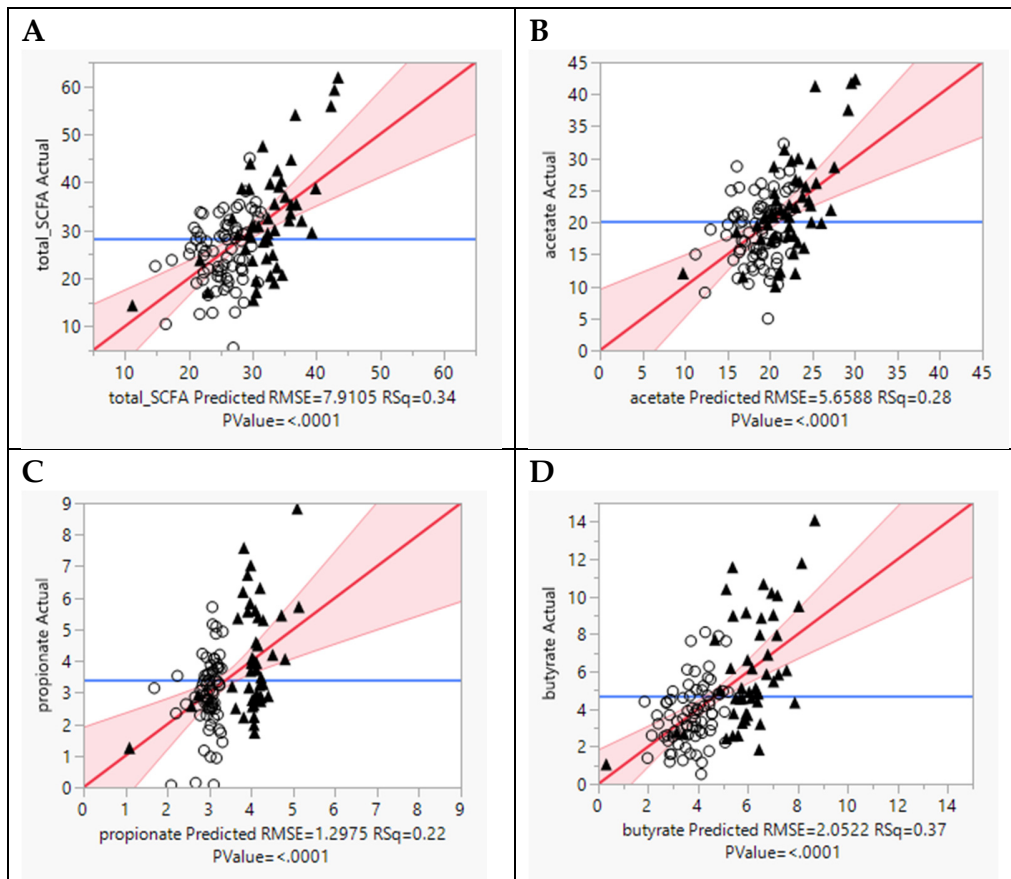

**Figure S2. Multiple linear regression models of total and individual SCFAs using sex, and microbial clusters 15, 13 and 2.** A) Total SCFA. B) Acetate. C) Propionate. D) Butyrate. Open circles – women; closed triangles = men. All models are significant at  $p < 0.0001$ .

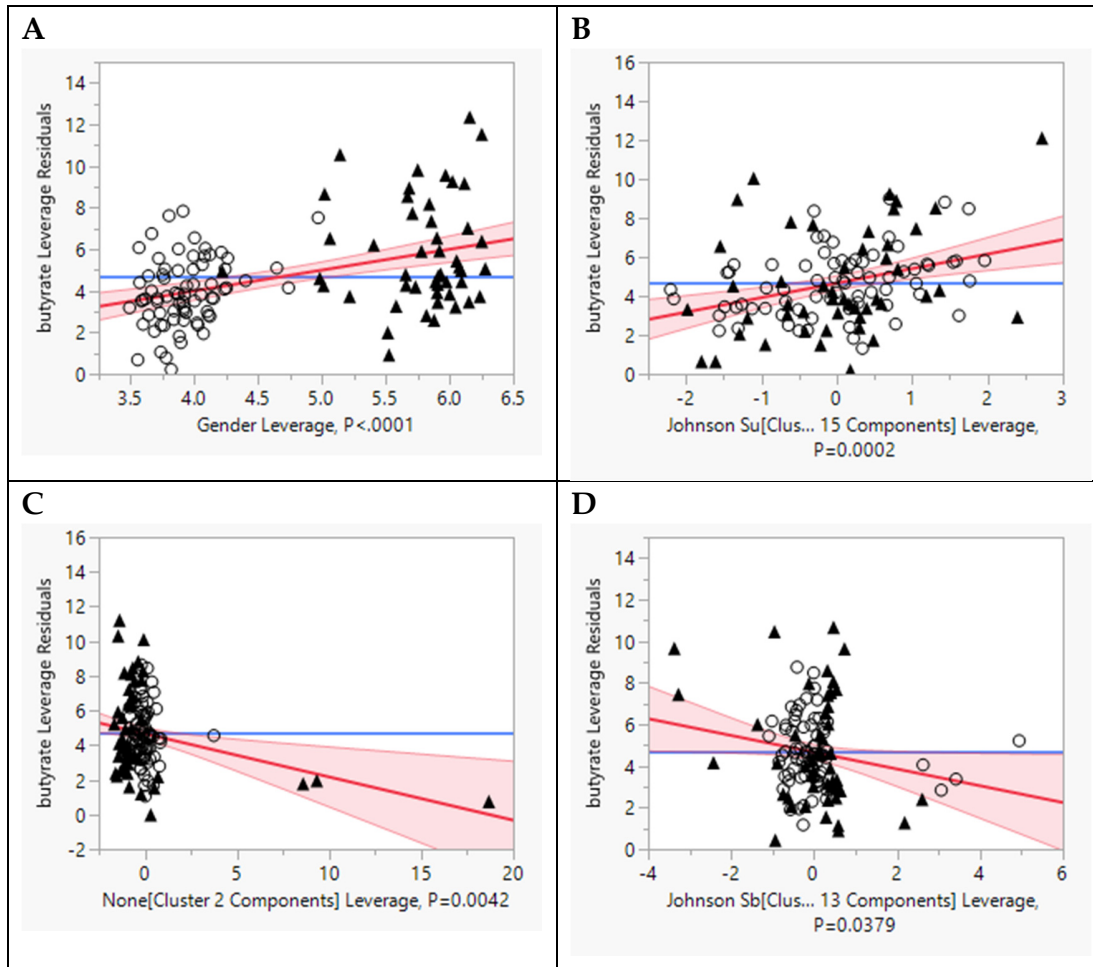

**Figure S3. Multiple linear regression models of butyrate using sex, and microbial clusters 15, 13 and 2. A) Sex. B) Cluster 15. C) Cluster 2. D) Cluster 13. Open circles – women; closed triangles = men. All models are significant at  $p < 0.0001$ .**

**Table S1. Dietary intake averaged from three 24-hour recalls obtained using ASA-24 during each intervention period**

|                                             |             | Resistant Starch (RS)<br>n=33 | Control<br>n=33 |
|---------------------------------------------|-------------|-------------------------------|-----------------|
| <b>Macronutrients</b>                       |             |                               |                 |
| Energy                                      | kcal/d      | 2659.1 ± 836.6                | 2580.2 ± 642.5  |
| Carbohydrate                                | g/d         | 341.0 ± 113.3                 | 338.1 ± 90.2    |
| Protein                                     | g/d         | 115.7 ± 34.1                  | 112.4 ± 34.7    |
| Total fat                                   | g/d         | 95.7 ± 41.0                   | 88.9 ± 26.8     |
| Dietary fiber                               | g/d         | 56.4 ± 19.4                   | 29.6 ± 15.2     |
|                                             | g/1000 kcal | 21.4 ± 3.2                    | 11.2 ± 3.6      |
| <b>Food type contributing dietary fiber</b> |             |                               |                 |
| Fruit                                       | cup-equiv/d | 1.9 ± 1.9                     | 1.4 ± 1.2       |
| Vegetables                                  | cup-equiv/d | 2.1 ± 1.1                     | 1.9 ± 1.1       |
| Legumes                                     | cup-equiv/d | 0.5 ± 0.6                     | 0.5 ± 0.7       |
| Nuts & seeds                                | oz-equiv/d  | 1.4 ± 2.2                     | 2.5 ± 3.8       |
| Whole grains                                | oz-equiv/d  | 0.9 ± 1.2                     | 1.2 ± 1.4       |
| Refined grains                              | oz-equiv/d  | 7.1 ± 2.8                     | 7.7 ± 3.2       |

Footnote: Values are mean ± standard deviation

**Table S2. DESeq2 results of effect of treatment on microbial taxa**

| RS vs. C         |                |                  |                  |                                       |
|------------------|----------------|------------------|------------------|---------------------------------------|
| Direction Change | log2FoldChange | pvalue           | Padj             | Taxon                                 |
| Increase         | 0.661          | <b>0.003</b>     | 0.07             | <i>g__Faecalibacterium</i>            |
| Increase         | 1.352          | <b>0.001</b>     | <b>0.031</b>     | <i>g__Ruminococcus</i>                |
| Increase         | 1.3            | <b>&lt;0.001</b> | <b>0.022</b>     | <i>g__Geminger</i>                    |
| Increase         | 1.001          | <b>0.046</b>     | 0.742            | <i>g__Bifidobacterium</i>             |
| Decrease         | -1.436         | <b>0.018</b>     | 0.37             | <i>g__[Ruminococcus]</i> <sup>†</sup> |
| RS vs. Pre-RS    |                |                  |                  |                                       |
| Direction Change | log2FoldChange | pvalue           | Padj             | Taxon                                 |
| Increase         | 0.986          | <b>&lt;0.001</b> | <b>&lt;0.001</b> | <i>g__Faecalibacterium</i>            |
| Increase         | 1.923          | <b>&lt;0.001</b> | <b>&lt;0.001</b> | <i>g__Ruminococcus</i>                |
| Increase         | 1.517          | <b>0.002</b>     | <b>0.03</b>      | <i>g__Roseburia</i>                   |
| Increase         | 1.619          | <b>&lt;0.001</b> | <b>&lt;0.001</b> | <i>g__Geminger</i>                    |
| Increase         | 2.839          | <b>&lt;0.001</b> | <b>&lt;0.001</b> | <i>g__Bifidobacterium</i>             |
| Increase         | 1.166          | <b>0.011</b>     | 0.152            | <i>f__Rikenellaceae</i>               |
| C vs. Pre-C      |                |                  |                  |                                       |
| Direction Change | log2FoldChange | pvalue           | Padj             | Taxon                                 |
| Increase         | 0.614          | <b>0.028</b>     | 1                | <i>g__Bacteroides</i>                 |
| Increase         | 1.756          | <b>0.001</b>     | <b>0.048</b>     | <i>g__Bifidobacterium</i>             |

<sup>†</sup> *g\_\_[Ruminococcus]* belongs to family *Lachnospiraceae*. Abbreviations: Control (C), Resistant Starch (RS).

**Table S3.** Short-chain fatty acid concentrations

| <b>Treatment</b> | <b>Total SCFAs<br/>(<math>\mu\text{mol}/\text{mg}</math>)</b> | <b>Acetate<br/>(<math>\mu\text{mol}/\text{mg}</math>)</b> | <b>Butyrate<br/>(<math>\mu\text{mol}/\text{mg}</math>)</b> | <b>Propionate<br/>(<math>\mu\text{mol}/\text{mg}</math>)</b> | <b>Acetate (%)</b> | <b>Butyrate (%)</b> | <b>Propionate (%)</b> |
|------------------|---------------------------------------------------------------|-----------------------------------------------------------|------------------------------------------------------------|--------------------------------------------------------------|--------------------|---------------------|-----------------------|
| Pre-C            | 27.9 $\pm$ 7.3                                                | 20.6 $\pm$ 5.3                                            | 4.1 $\pm$ 1.9                                              | 3.2 $\pm$ 1                                                  | 73.9 $\pm$ 6       | 14.5 $\pm$ 4.3      | 11.5 $\pm$ 2.4        |
| Control          | 28.9 $\pm$ 9.6                                                | 20.5 $\pm$ 6.5                                            | 4.7 $\pm$ 2.7                                              | 3.7 $\pm$ 1.4                                                | 71.5 $\pm$ 6.4     | 15.8 $\pm$ 4.5      | 12.8 $\pm$ 3          |
| Pre-RS           | 27.1 $\pm$ 11                                                 | 19.2 $\pm$ 7.1                                            | 4.8 $\pm$ 3                                                | 3.1 $\pm$ 1.7                                                | 72.7 $\pm$ 8.5     | 16.4 $\pm$ 5.8      | 10.9 $\pm$ 4.6        |
| RS               | 29 $\pm$ 10.4                                                 | 20.4 $\pm$ 7.3                                            | 5 $\pm$ 2.5                                                | 3.5 $\pm$ 1.6                                                | 70.8 $\pm$ 5.6     | 16.9 $\pm$ 4.5      | 12.4 $\pm$ 3.2        |

Footnote: Values shown are mean  $\pm$  standard deviation. Abbreviations: Before Control (Pre-C), Before Resistant Starch (Pre-RS), Resistant Starch (RS), short-chain fatty acids (SCFAs).

**Table S4. Variable Clustering of Microbial Taxa**

| Cluster | Members                                                       | RSquare with Own Cluster | RSquare with Next Closest | 1-RSquare Ratio |
|---------|---------------------------------------------------------------|--------------------------|---------------------------|-----------------|
| 1       | f__Christensenellaceae_203f3186ffa10b8d5f79bb46f6131932_per   | 0.9                      | 0.08                      | 0.11            |
| 1       | g__Leuconostoc_4c28ca21cfe8aae96cb4fd4da962e00f_per           | 0.83                     | 0.06                      | 0.19            |
| 1       | g__Anaerotruncus_b0380be317ab3d535fda80361fef72dc_per         | 0.82                     | 0.06                      | 0.19            |
| 1       | g__Methanobrevibacter_e10723224eb30a57e03cfb25428192cf_per    | 0.71                     | 0.03                      | 0.29            |
| 1       | f__Mogibacteriaceae_0acda530a021f0442db672257bd840f0_per      | 0.65                     | 0.16                      | 0.42            |
| 1       | g__Oscillospira_c9b3d3582dd7a6714e0f50fc0aae5358_per          | 0.53                     | 0.12                      | 0.54            |
| 1       | g__Bilophila_8844ba6ff4d7fd8255aca7553a70aa8a_per             | 0.36                     | 0.1                       | 0.71            |
| 1       | g__Dorea_da2938f07b3eb5e35cfff90b0d8f4afe_per                 | 0.3                      | 0.07                      | 0.75            |
| 1       | g__Streptococcus_0718e6f569c5f42fe6114ed5288343b8_per         | 0.41                     | 0.23                      | 0.77            |
| 2       | f__Victivallaceae_a91b2451ac106c648fb81c8e49d6e0d6_per        | 0.95                     | 0.05                      | 0.05            |
| 2       | c__Alphaproteobacteria_7751a67b387f17023737d1585e35db46_per   | 0.9                      | 0.06                      | 0.11            |
| 2       | f__Anaeroplasmataceae_c989da24af206e59a99e928bccbdcc55_per    | 0.78                     | 0.05                      | 0.23            |
| 2       | o__Burkholderiales_5b2186549c92b9ec4d264e623f029d51_per       | 0.77                     | 0.04                      | 0.24            |
| 2       | k__Bacteria_02c4a0e511d46189db78ebc317e63b6b_per              | 0.73                     | 0.07                      | 0.29            |
| 2       | g__Desulfovibrio_3baebc874e88c0cb86678ea3ab710b51_per         | 0.71                     | 0.1                       | 0.33            |
| 2       | o__ML615J28_8d1e851ccf8a60ba51dd032cf3e71106_per              | 0.31                     | 0.11                      | 0.77            |
| 2       | o__Bacteroidales_d437a6d10db675a31fb9592048042dd4_per         | 0.02                     | 0.01                      | 0.99            |
| 3       | f__Erysipelotrichaceae_1a44da1de60bb0a2f54b6bb01e03544f_per   | 0.64                     | 0.06                      | 0.39            |
| 3       | g__Odoribacter_fd90fd536d69fbb927700a4f816b5437_per           | 0.5                      | 0.1                       | 0.55            |
| 3       | f__Barnesiellaceae_a5144553aa7bd505c53b2005926ac4bf_per       | 0.42                     | 0.15                      | 0.68            |
| 3       | g__Sutterella_f906f7c32eca8e6d5b140f23676d4cb2_per            | 0.38                     | 0.1                       | 0.68            |
| 3       | o__RF39_223de6c418e8ae64c4e8d5ca99fe21ea_per                  | 0.27                     | 0.14                      | 0.85            |
| 3       | g__Clostridium_3c36049d1d75e84b7fea2e92b2c38831_per           | 0.17                     | 0.04                      | 0.86            |
| 4       | f__Peptostreptococcaceae_f6bc3b448024a35619eff2bb01a03279_per | 0.99                     | 0.07                      | 0.01            |
| 4       | g__Lachnobacterium_2b91198581ae3c6f6ecff1dd239de5ac_per       | 0.99                     | 0.07                      | 0.01            |
| 4       | g__Megasphaera_2cb1b23a0065cd57f3c80c2098e519fc_per           | 0.97                     | 0.15                      | 0.03            |
| 4       | f__Clostridiaceae_8a02d54c269bac1e3d87b352b795489e_per        | 0.03                     | 0.01                      | 0.98            |
| 5       | g__Eggerthella_8ab2345734740ca1475a36fdc37c6209_per           | 0.82                     | 0.02                      | 0.18            |
| 5       | g__Collinsella_cf19aa76c5793bbcbdfef8b6e4e497245_per          | 0.74                     | 0.02                      | 0.26            |
| 5       | f__Fusobacteriaceae_4865f293826e093f78ce53f60e06604c_per      | 0.62                     | 0.03                      | 0.39            |
| 5       | g__Paraprevotella_622cff538fea6cf8fece6dc45b54a836_per        | 0.39                     | 0.02                      | 0.63            |
| 6       | g__Clostridium_efc3d396dde8734eb0d089c04450d367_per           | 0.59                     | 0.04                      | 0.42            |
| 6       | g__Veillonella_4226524157c73e083234aea083217bab_per           | 0.4                      | 0.02                      | 0.61            |
| 6       | g__Faecalibacterium_5c4e76bbeb28b2680f454895ec903c48_per      | 0.46                     | 0.12                      | 0.62            |
| 7       | g__human_3e40c62f5d6da776aaf8060a9403d763_per                 | 0.84                     | 0.07                      | 0.17            |
| 7       | g__Acidaminococcus_57629fd74969b126a829f2514e883c63_per       | 0.74                     | 0.1                       | 0.29            |
| 7       | f__Coriobacteriaceae_8bfce0da546a02a357896cdb978cec3d_per     | 0.33                     | 0.03                      | 0.69            |
| 7       | g__Ruminococcus_7171cdaa3c82bba37a16f57143794b42_per          | 0.25                     | 0.09                      | 0.83            |
| 8       | o__Clostridiales_8c42ed4e97c974ba144a2bb088a5fb70_per         | 0.66                     | 0.15                      | 0.41            |

|    |                                                               |      |      |      |
|----|---------------------------------------------------------------|------|------|------|
| 8  | g__Bacteroides_f128b8cdf56dad0ff08cf868e6663af7_per           | 0.59 | 0.12 | 0.47 |
| 8  | f__Ruminococcaceae_df89fce167303ab357d1ff2779dc6198_per       | 0.63 | 0.22 | 0.47 |
| 8  | f__Rikenellaceae_e399cfd28cb3218d9c310ca108f8704a_per         | 0.29 | 0.05 | 0.75 |
| 8  | g__Butyrivibrio_aa16e4a118d63f745fe047b885e0272e_per          | 0.33 | 0.12 | 0.76 |
| 9  | g__Anaerofustis_a792724b1ca76b19670d137432e8b69e_per          | 0.86 | 0    | 0.14 |
| 9  | g__SMB53_dde86150efe323dbe1986fdc1a3aaf7b_per                 | 0.82 | 0.03 | 0.18 |
| 9  | g__Lachnospira_17dba817f4132be19c8d41450fdbd7cc_per           | 0.2  | 0.04 | 0.84 |
| 10 | g__Barnesiella_1c6db45aef5a29ae4089ca4f3bf64720_per           | 0.68 | 0.09 | 0.35 |
| 10 | o__RF32_4acc4d01f5d8d1edbf2a251c434386d4_per                  | 0.61 | 0.12 | 0.45 |
| 10 | g__Anaerostipes_aec581a4afb8a54d6939718f1f9fcc71_per          | 0.15 | 0.03 | 0.88 |
| 11 | g__Blautia_b35811152097574225863af5ed2ccc7c_per               | 0.61 | 0.09 | 0.43 |
| 11 | g__Clostridium_720a468b4b430d4ab966842d8ed9cfc5_per           | 0.55 | 0.01 | 0.46 |
| 11 | g__Akkermansia_129a6f55c08bef50c705ae8f67515c41_per           | 0.54 | 0.03 | 0.48 |
| 12 | g__Turicibacter_906d01920ac6d2294524968f3bda9e08_per          | 0.71 | 0.13 | 0.33 |
| 12 | g__Lactococcus_d526eeb78ad98f4a50742189333e4f6a_per           | 0.65 | 0.08 | 0.38 |
| 12 | g__Gemmiger_3928a4255d8b9bed26ef0020f58f4220_per              | 0.23 | 0.07 | 0.83 |
| 13 | g__Butyricoccus_e0812126349e0f12a7e57b76ce570e35_per          | 0.66 | 0.05 | 0.36 |
| 13 | g__Coprobacillus_f8817a191dcc7efe5f482e30e232bc4e_per         | 0.62 | 0    | 0.38 |
| 13 | f__Lachnospiraceae_1f9c02db43c1e5681fe0e9f7e4fad5ea_per       | 0.09 | 0.03 | 0.94 |
| 14 | g__Dialister_fecea4659c5bf13af5c0a1b3aedc543b_per             | 0.6  | 0.06 | 0.43 |
| 14 | g__Ruminococcus_6940da4d95e8cdadfad5c7e1b7f87cf_per           | 0.47 | 0.04 | 0.56 |
| 14 | g__Fusobacterium_e49627cc0a046ee60bcc135d44b6d3d8_per         | 0.4  | 0.09 | 0.66 |
| 15 | g__Roseburia_cb4ccead11fd04cab24fe711fd909f27_per             | 0.53 | 0.06 | 0.5  |
| 15 | g__Ruminococcus_311d9d226a66ab84f1a8433ced7736c_per           | 0.43 | 0.16 | 0.68 |
| 15 | g__Parabacteroides_f76b8710c3b2198831504bd01ffae4ed_per       | 0.37 | 0.13 | 0.73 |
| 15 | g__Butyricimonas_1900db1f5b39fd3ce2e088d66e0c05ab_per         | 0.3  | 0.06 | 0.74 |
| 15 | g__Lactobacillus_a59d195eebab2efb90ff4a0addba5771_per         | 0.13 | 0    | 0.88 |
| 16 | f__Gemellaceae_224a108589d9e4b62a8b3fcf3f0a9da_per            | 0.64 | 0.02 | 0.37 |
| 16 | g__Eubacterium_320423dc5590a7d4a98086920cebd972_per           | 0.64 | 0.07 | 0.39 |
| 17 | f__Paraprevotellaceae_3620984cfb2002b931b33b6690de016c_per    | 0.79 | 0.07 | 0.23 |
| 17 | f__S247_df90fc79bc38a50c40533a043e7cb46b_per                  | 0.75 | 0.24 | 0.33 |
| 17 | g__Phascolarctobacterium_0ce3ba441b32bcf0771cde152e2b5653_per | 0.27 | 0.09 | 0.81 |
| 18 | g__Prevotella_0264c34983e970203513d396a0a48a3c_per            | 0.68 | 0.09 | 0.36 |
| 18 | g__Prevotella_5be9b95af0add8f78178c24766ec4a2b_per            | 0.63 | 0.13 | 0.42 |
| 18 | g__Bifidobacterium_34207721d3d8489c257c3d33920b0eb1_per       | 0.17 | 0.02 | 0.84 |
| 19 | g__Slackia_c82e12406ddc70448f2302ea91056172_per               | 0.61 | 0.01 | 0.39 |
| 19 | g__Alistipes_2726333037520ac21b775f84caa83edf_per             | 0.61 | 0.07 | 0.41 |
| 20 | p__Firmicutes_423cb807aa790bc1a08a54db03dd3437_per            | 0.7  | 0.01 | 0.3  |
| 20 | o__YS2_591192c6fff8932e640709000f76a462_per                   | 0.7  | 0.04 | 0.31 |
| 21 | g__Oxalobacter_d1452c3438020be1396c8ee1b01b5d4_per            | 0.52 | 0    | 0.48 |
| 21 | g__Coproccoccus_8c5e689e16544c2b0fd718250c392c06_per          | 0.52 | 0.07 | 0.51 |

Footnote: Microbial taxa names shown as: taxonomic level (g: genus, f: family, o: order, c: class, p: phylum)\_taxonomic name\_sequence variant (SV) number\_percent (relative abundance). g\_\_Ruminococcus\_6940da4d95e8cdadfad5c7e1b7f87cf\_per belongs to family *Lachnospiraceae* and g\_\_Ruminococcus\_7171cdaa3c82bba37a16f57143794b42\_per belongs to family *Ruminococcaceae*.
